# Supplementary material for: 2-Heptyl-Formononetin Increases Cholesterol and Induces Hepatic Steatosis in Mice
Source: Hindawi journal article supplement (doi:10.1155/2013/926942), 2013-01-01

## Supplementary data

**Supplementary Table 1:** Composition of the diets.

|                              | <b>C1000</b> | <b>Cholesterol</b> | <b>Cholesterol +<br/>Formononetin</b> | <b>Cholesterol<br/>+ C7F</b> |
|------------------------------|--------------|--------------------|---------------------------------------|------------------------------|
| <b>Energy, kcal/kg</b>       | 3518         | 3444               | 3444                                  | 3444                         |
| <b>Crude protein, g/kg</b>   | 176          | 176                | 176                                   | 176                          |
| <b>Crude fat, g/kg</b>       | 50.8         | 66.6               | 66.6                                  | 66.6                         |
| <b>Crude fibre, g/kg</b>     | 40.5         | 31.0               | 31.0                                  | 31.0                         |
| <b>Disaccharides, g/kg</b>   | 111          | 111                | 111                                   | 111                          |
| <b>Polysaccharides, g/kg</b> | 472          | 454                | 454                                   | 454                          |
| <b>Cholesterol, g/kg</b>     | 0            | 20                 | 20                                    | 20                           |
| <b>Formononetin, mg/kg</b>   | 0            | 0                  | 1000                                  | 0                            |
| <b>C7F, mg/kg</b>            | 0            | 0                  | 0                                     | 1300                         |

**Supplemental Table 2:** A list of functional gene groupings included in the gene expression array analysis of phase I and II enzymes on C57BL/6 mice fed cholesterol supplemented formononetin or 2-heptyl formononetin (CF7) for three weeks (experiment 1).

---

**Drug Transporters:**

Metallothioneins: Mt2, Mt3.

P-Glycoprotein Family: Abcb1a, Abcb1b, Abcb4, Abcc1, Gpi1.

**Phase I Metabolising Enzymes:**

P450 Family: Cyp11b2, Cyp17a1, Cyp19a1, Cyp1a1, Cyp1a2, Cyp27b1, Cyp2b10, Cyp2C29, Cyp2e1, Cyp4b1.

**Phase II Metabolising Enzymes:**

Carboxylesterases: Ces1, Ces2.

Decarboxylases: Gad1, Gad2.

Dehydrogenases: Adh1, Adh4, Adh5, Alad, Aldh1a1, Hsd17b1, Hsd17b2, Hsd17b3.

Glutathione Peroxidases: Gpx1, Gpx2, Gpx3, Gpx5, Gsta1, Gsta3, Gsta4, Gstm1, Gstm2, Gstm3, Gstm4, Gstm5, Gstp1, Gstt1, Gstz1, Lpo, Mpo.

Hydrolases: Ephx1, Faah, Fbp1.

Kinases: Hk2, Pklr, Pkm2.

Lipoxygenases: Alox12, Alox15, Alox5, Apoe.

Oxidoreductases: Blvra, Blvrb, Cyb5r3 (Dia1), Gpx1, Gpx2, Gsr, Mthfr, Nos3, Nqo1, Srd5a1, Srd5a2.

Paraoxonases: Pon1, Pon2, Pon3.

Sulfotransferases: Chst1, Gsta3, Gstm2, Gstm3, Gstm5, Gstp1, Gstt1, Mgst1, Mgst2, Mgst3.

Transferases: Nat1, Nat2, Comt, Ggt1.

**Other Genes Related to Drug Metabolism:** Abp1, Ahr, Arnt, Asna1, Gckr, Marcks, Smarcal1, Snn.

---

**Supplemental Table 3: Primer sequences.**

| <b>Gene name</b> | <b>Trivial name</b>                                                      | <b>5' prime</b>                       | <b>3' prime</b>                       |
|------------------|--------------------------------------------------------------------------|---------------------------------------|---------------------------------------|
| <i>Rn18S</i>     | Ribosomal 18S                                                            | GTA ACC CGT TGA<br>ACC CCA TT         | CCA TCC AAT CGG<br>TAG TAG CG         |
| <i>Acat2</i>     | Acetyl-coA acetyltransferase 2                                           | GGT GGA ACT ATG<br>TGG CCA AGA        | CCA GGA TGA AGC<br>AGG CAT AGA        |
| <i>Acaca</i>     | Acetyl-coA carboxylase alpha                                             | TGC TGC CCC ATC<br>CCC GGG            | TCG AAC TCT CAC TGA<br>CAG G          |
| <i>Acox1</i>     | Acyl-Coenzyme A oxidase 1                                                | GAT CAC GGG CAC<br>TTA TGC G          | CGA AGA TGA GTT<br>CCA TGA CCC        |
| <i>Atgl</i>      | Adipose triglyceride lipase                                              | CAT CTC CCT GAC<br>TCG TGT TTC        | CAA GTT GTC TGA<br>AAT GCC GC         |
| <i>Cebpa</i>     | CCAAT/enhancer binding protein alpha                                     | CAA GAA CAG CAA<br>CGA GTA CCG        | GTC ACT GGT CAA CTC<br>CAG CAC        |
| <i>Cpt1a</i>     | Carnitine palmitoyltransferase 1a                                        | TAC TGL TGT ATC GTC<br>GCA CG         | GAC GAA TAG GTT<br>TGA GTT CCT CAC    |
| <i>Cpt1b</i>     | Carnitine palmitoyltransferase 1b                                        | GAT CTG GGC TAT<br>CTG TGT CCG T      | ACG TTT GGA AGC<br>TGT AGA GCA TG     |
| <i>Cyp7a1</i>    | Cholesterol 7 alpha-hydroxylase                                          | AGC AAC TAA ACA<br>ACC TGC CAG TAC TA | GTC CGG ATA TTC<br>AAG GAT GCA        |
| <i>Dgat2</i>     | Diglyceride acyltransferase 2                                            | GGG TCC AGA AGA<br>AGT TCC AGA AG     | CCC AGG TGT CAG<br>AGG AGA AGA G      |
| <i>Emr1</i>      | EGF-like module containing, mucin-like, hormone receptor-like sequence 1 | CTT TGG CTA TGG<br>GCT TCC AGT        | GCA AGG AGG ACA<br>GAG TTT ATC TGT    |
| <i>Fasn</i>      | Fatty acids synthase                                                     | ATT GGT GGT GTG<br>GAC ATG            | CCCAGC CTT CCA TCT<br>CCT G           |
| <i>Gpat1</i>     | Glycerol phosphate acyltransferase 1                                     | GCT ATC ATG TCC<br>ACC CAC ATT G      | ACT TCC TCC TTC ATC<br>ACA AAG AAG TC |
| <i>Hmgcr</i>     | 3-hydroxy-3-methylglutaryl-Coenzyme A Reductase                          | CCC TGA GTT TAG<br>CCT TCC TTT TG     | GCT TTC TTT GAG GTC<br>ACG ACG G      |
| <i>Ldlr</i>      | Low density lipoprotein receptor                                         | GCA TCA GCT TGG<br>ACA AGG TGT        | GGG AAC AGC CAC<br>CAT TGT TG         |
| <i>Mlxipl</i>    | MLX interacting protein-like                                             | CTT CTT CCG TTG CAC<br>ATA CTG        | GTT GCT ATG CCG<br>GGA CAA GA         |
| <i>Mttp</i>      | Microsomal triglyceride transfer protein                                 | CAA GCT CAC GTA<br>CTC CAC TGA AG     | TCA TCA TCA CCA TCA<br>GGA TTC CT     |
| <i>Nr1h3</i>     | Nuclear receptor subfamily 1, group H, member 3                          | CCG ACA GAG CTT<br>CGT CC             | CCC ACA GAC ACT<br>GCA CAG            |
| <i>Nr1h4</i>     | Nuclear receptor subfamily 1, group H, member 4                          | CCA ACC TGG GTT<br>TCT ACC C          | CAC ACA GCT CAT<br>CCC CTT T          |
| <i>Ppara</i>     | Peroxisome proliferator-activated receptor alpha                         | AGA GAG GAC AGA<br>TGG GGC TC         | CGT TTG TGG CTG<br>GTC AAG TT         |
| <i>Pparg2</i>    | Peroxisome proliferator-activated receptor gamma 2                       | ACAGCAAATCTCTGT<br>TTTATGC            | TGCTGGAGAAATCAAC<br>TGTGG             |
| <i>Scd1</i>      | Stearoyl-CoA desaturase-1                                                | ACA CCT GCC TCT<br>TCG GGA TT         | TGA TGG CCA GAG<br>CGC TG             |
| <i>Srebf1</i>    | Sterol regulatory element-binding protein-1c                             | GGA GCC ATG GAT<br>TGC ACA TT         | GCT TCC AGA GAG<br>GAG GCC AG         |
| <i>Tnf</i>       | Tumour necrosis factor                                                   | CCC TCA CAC TCA<br>GAT CAT CTT CT     | GCT ACG ACG TGG<br>GCT ACA G          |
| <i>Ucp1</i>      | Uncoupling protein 1                                                     | AGCCGGCTTAATGACT<br>GGAG              | TCTGTAGGCTGCCCAA<br>TGAAC             |

## Supplementary figure legends and figures

**Supplementary Figure 1:** Clustering of gut microbiota from C57BL/6 mice fed formononetin or 2-heptyl formononetin (C7F) (experiment 1) (n=23-25). Three-dimensional principal component analysis (3D-PCA) based on denaturation gradient gel electrophoresis data. Black circle: cholesterol, red square: formononetin, green square: C7F. The clustering was significant on the Y-axis and the Z-axis. On the Y-axis C7F fed mice clustered significantly differently from mice fed cholesterol and the formononetin. Also the formononetin fed mice clustered significantly differently from mice fed cholesterol. On the Z-axis the C7F fed mice clustered borderline differently from mice fed cholesterol.

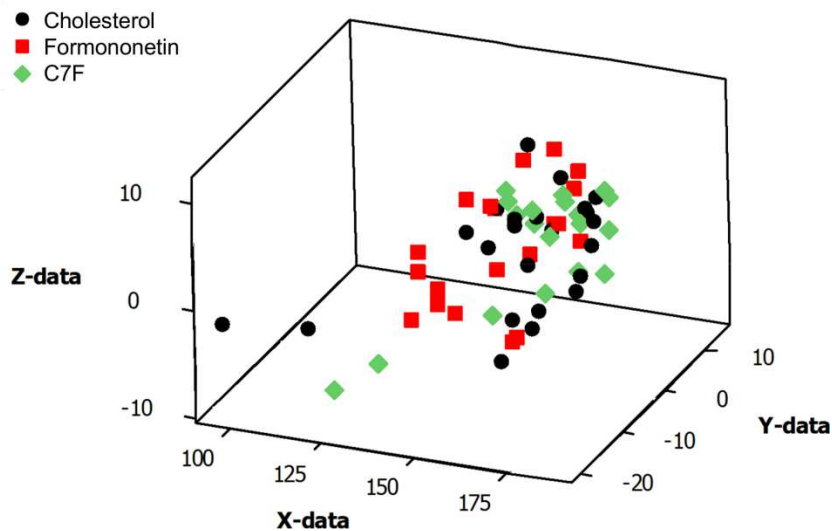

**Supplementary Figure 2:** Gene expression of phase I and II metabolites (experiment 1). Scatter plot of liver gene expression (n=23-25). Gene expression in **A** mice fed chow compared to formononetin, **B** chow compared to C7F and **C** formononetin compared to C7F.

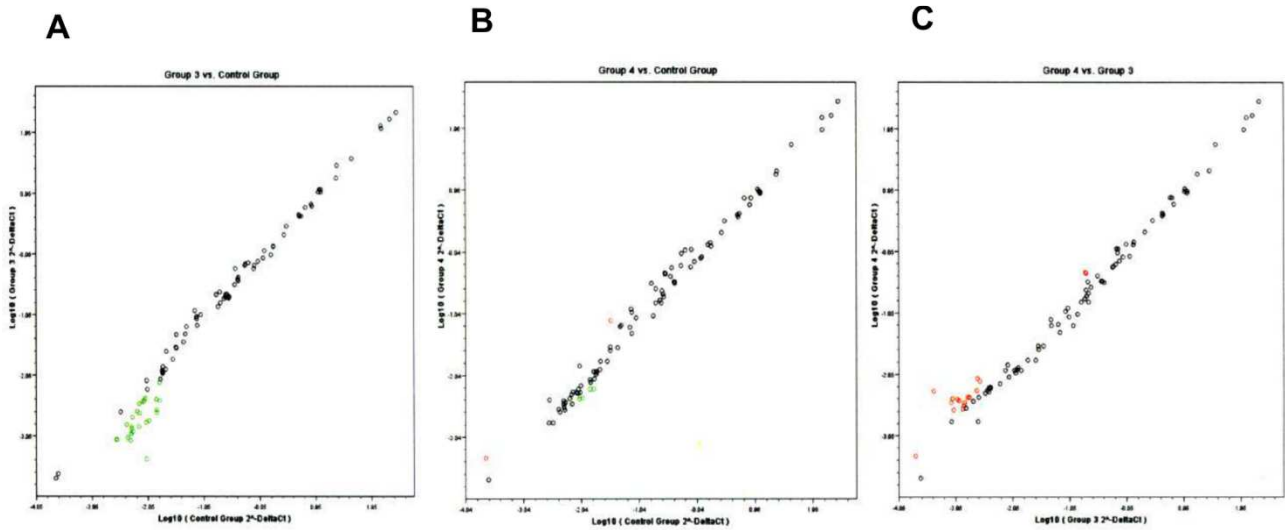

**Supplementary Figure 3:** Body weight of C57BL/6 mice fed chow, cholesterol or cholesterol supplemented formononetin or 2-heptyl-formononetin (C7F) for five weeks (experiment 2) (n=8). Graphs shows mean  $\pm$  SEM.

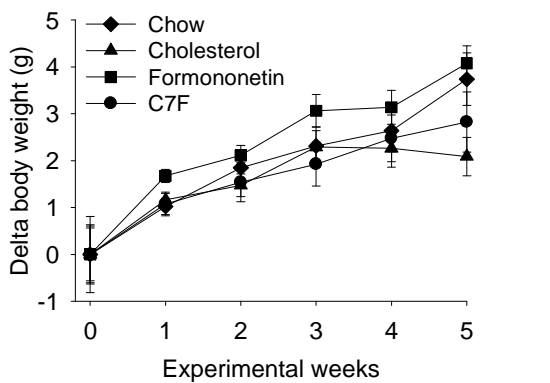

**Supplementary Figure 4:** Total feed intake in C57BL/6 mice fed chow, cholesterol or cholesterol supplemented formononetin or 2-heptyl-formononetin (C7F) for five weeks (experiment 2) (n=8).

Graphs shows mean  $\pm$  SEM.

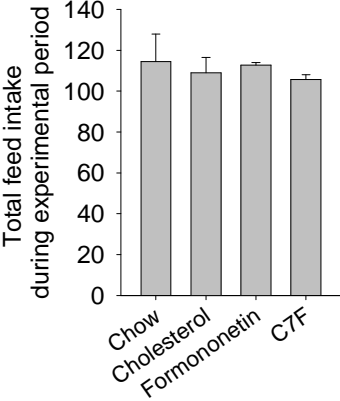

Supplement: f1 [file 926942.f1.pdf]
